# Supplementary material for: Versatile synthesis of nanometer sized hollow silica spheresElectronic supplementary information (ESI) available: experimental; IR and XPS; AFM, SEM and TEM images. See http://www.rsc.org/suppdata/cc/b2/b212811j/
Source: Royal Society of Chemistry journal article supplement (doi:10.1039/b212811j), 2003-03-21

## Versatile Synthesis of Nanometer Sized Hollow Silica Spheres

**Jeroen J. L. M. Cornelissen, Eric. F. Connor, Ho-Cheol Kim, Victor Y. Lee, Teddie Magibitang, Philip M. Rice, Willi Volksen, Linda K. Sundberg and Robert D. Miller.\***

IBM Almaden Research Center, 650 Harry Road, San Jose, CA 95120, United States. Fax: 1 408 927 3310; Tel: 1 408 927 1646; E-mail: [rdmiller@almaden.ibm.com](mailto:rdmiller@almaden.ibm.com)

### Supplementary Information

To synthesize the silica coated particles, the latex dispersions (2.4. to 2.6 w%) were injected into a 0.58 w% sodium silicate solution at pH = 9.7. The final concentrations ranged from 0.1 to 0.5 w% and the reaction mixtures were stirred for 24 hrs. To prevent precipitation due to the drop in pH, the dispersions were diluted to twice the volume of the reaction mixture after which they were dialysed against water to remove the excess salts. In a typical experiment, the silica coated particles were transferred to CH<sub>3</sub>CN by diluting 25 mL of a 0.1 w% aqueous dispersion with CH<sub>3</sub>CN (250 mL, after which all solvents were removed on a rotary evaporator until 15 – 25 mL remained. To this dispersion CH<sub>3</sub>CN (100 mL) was added and the volume was again reduced to 15 mL, this procedure was repeated twice. To the resulting water free dispersion, 1 mL 1,1,1,3,3,3-hexamethyldisilazane was added and the reaction mixture was stirred for 16 hrs. To this 35 mL MeOH was added and the precipitate was collected by centrifugation, washed 3 times by repetitive dispersion/centrifugation cycles in MeOH and air-dried, resulting in 22 mg of a white product. For TEM carbon coated formvar grids (Ted Pella Inc.) were used and for SEM silicon wafers.

IR spectra before and after calcination of coated polystyrene lattices with different diameters, measured in KBr pellets.

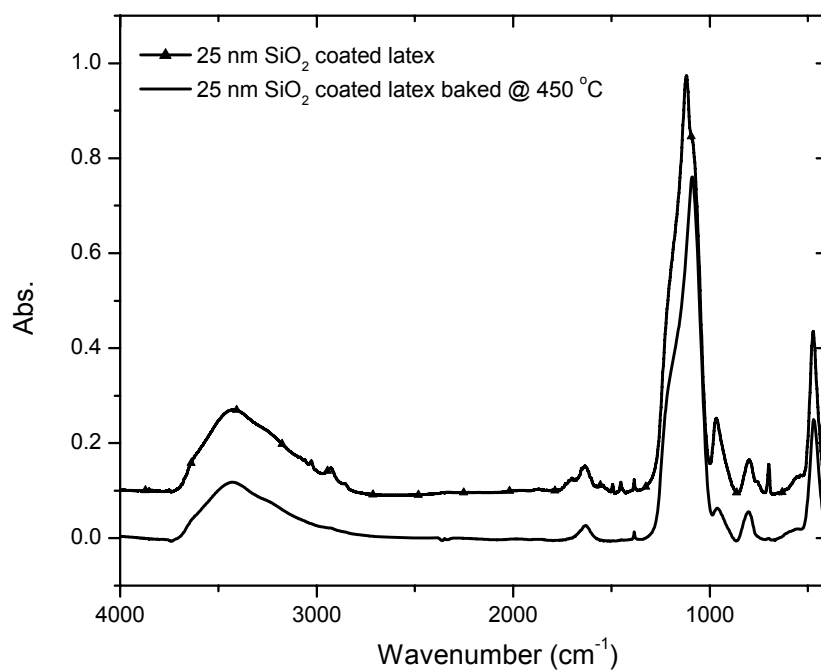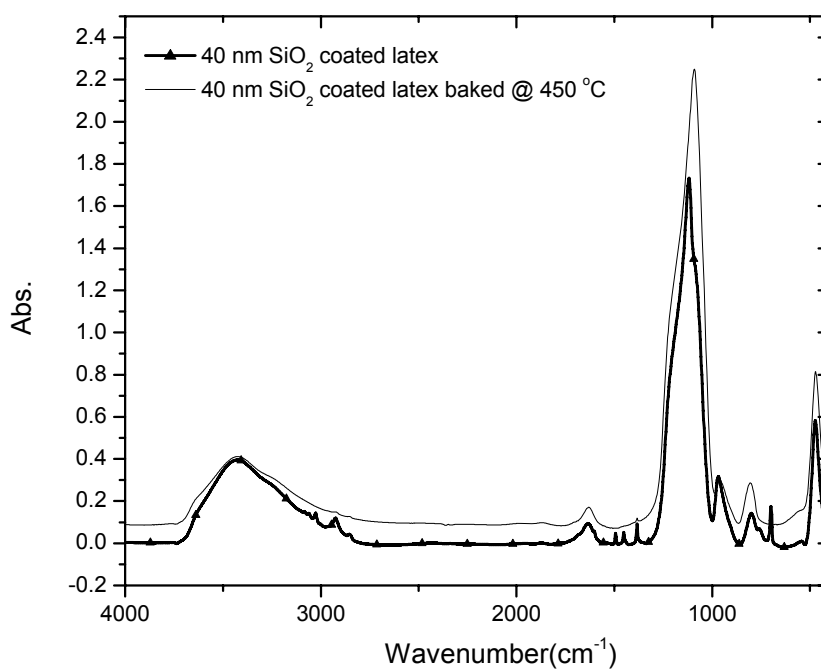

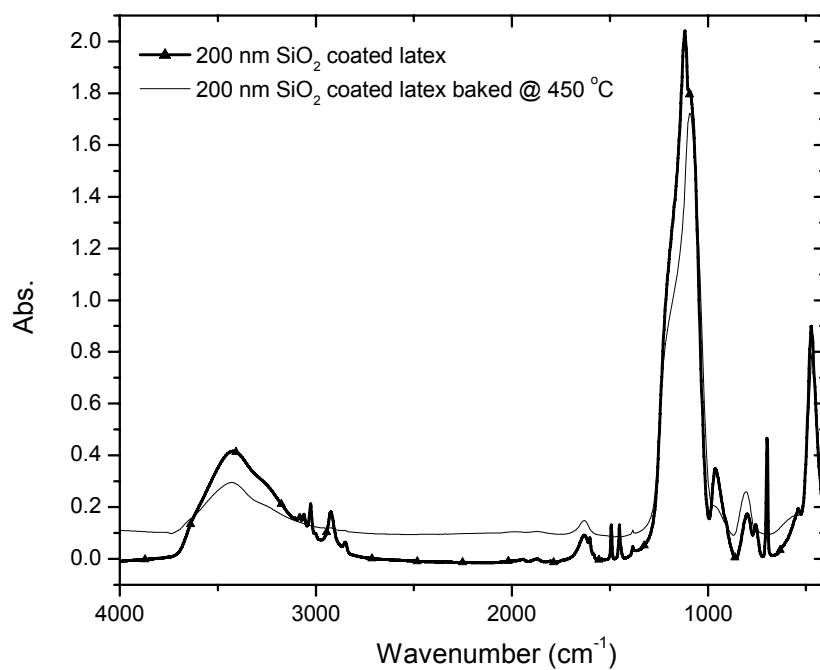

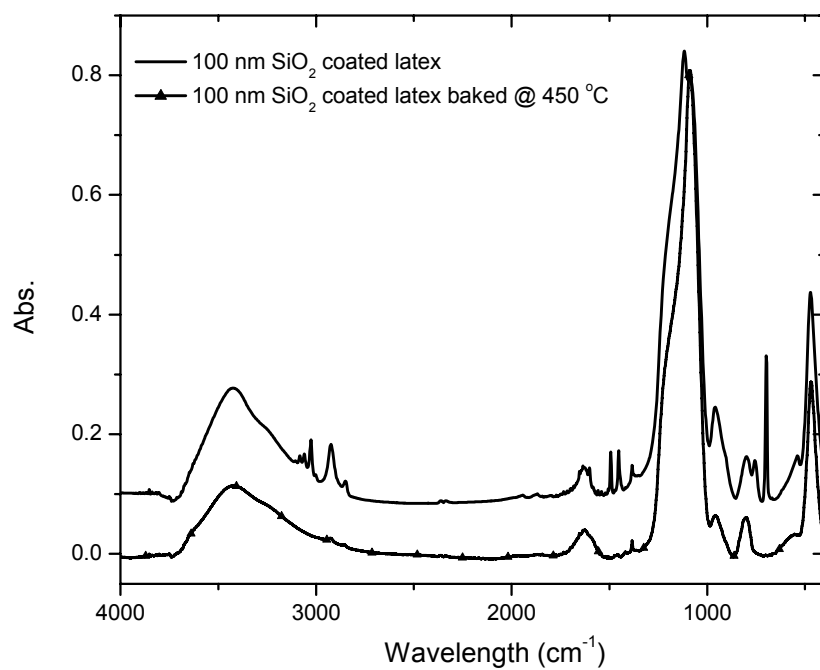

XPS measurements were carried out on drop-cast samples placed on gold-sputtered silicon wafers, the thickness of the gold layer was 350 nm.

Atom concentration table:

|                 | C1s  | O1s  | Si2p | Au4f | O/Si | C/Si |
|-----------------|------|------|------|------|------|------|
| Au ref          | 41.3 | 13.9 | 0.0  | 44.8 | na   | na   |
| 25 nm           | 34.7 | 41.0 | 10.6 | 13.7 | 3.8  | 3.3  |
| 25 nm calcined  | 4.0  | 67.0 | 26.7 | 2.4  | 2.5  | 0.1  |
|                 |      |      |      |      |      |      |
| AU ref          | 41.6 | 13.1 | 0.0  | 45.3 | na   | na   |
| 40 nm           | 36.3 | 47.3 | 14.2 | 2.1  | 3.3  | 2.5  |
| 40 nm calcined  | 9.5  | 66.0 | 24.5 | 0.0  | 2.7  | 0.4  |
|                 |      |      |      |      |      |      |
| Au ref          | 43.1 | 15.1 | 0.0  | 41.7 | na   | na   |
| 100 nm          | 12.9 | 62.6 | 23.2 | 1.3  | 2.7  | 0.6  |
| 100 nm calcined | 4.7  | 67.7 | 27.4 | 0.2  | 2.5  | 0.2  |
|                 |      |      |      |      |      |      |
| Au ref          | 38.2 | 14.1 | 0.0  | 47.8 | na   | na   |
| 200 nm          | 7.2  | 65.7 | 26.5 | 0.6  | 2.5  | 0.3  |
| 200 nm calcined | 26.7 | 50.8 | 17.6 | 4.8  | 2.9  | 1.5  |

High resolution XPS of the 25 nm sample; red = reference, blue = coated; green = calcined

Jeroen45.spe: C, Si content on Au

IBM Almaden

2002 Jul 11 Al mono 25.2 W 200.0  $\mu$ 45.0°

3.9831e+004 max

1.78 min

Si2p/Area3: JC42 area 3/1 (SG5)

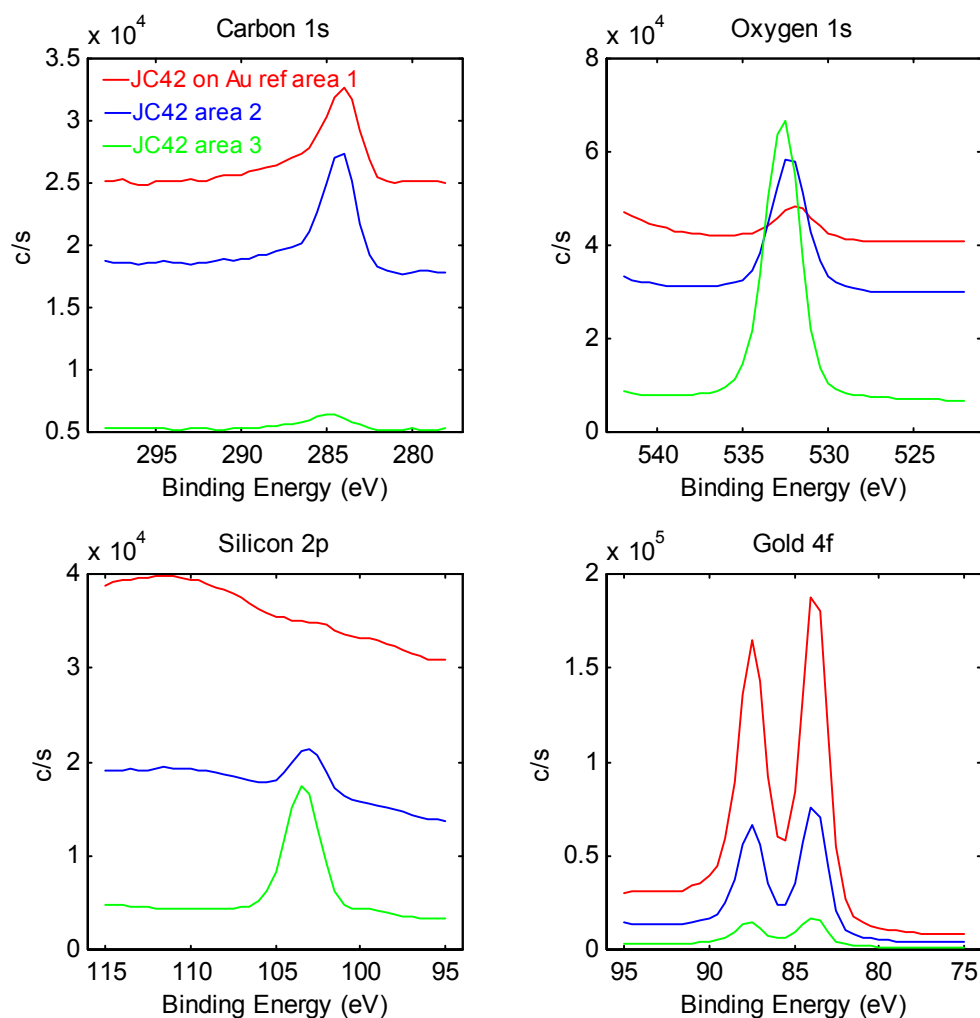

High resolution XPS of the 40 nm sample; red = reference, green = coated; blue= calcined

Jeroen48.spe: C, Si content on Au

IBM Almaden

2002 Jul 11 Al mono 25.2 W 200.0  $\mu$ 45.0°

3.8416e+004 max

1.78 min

Si2p/Area6: JC43 area 6/1

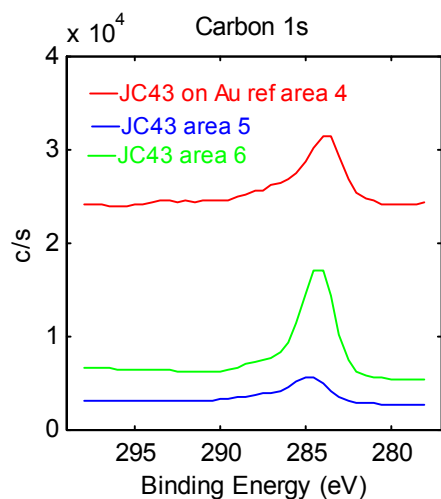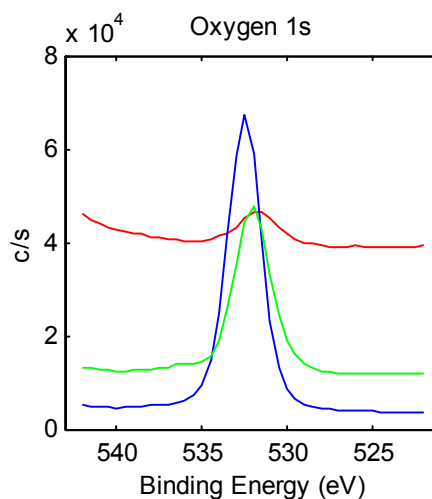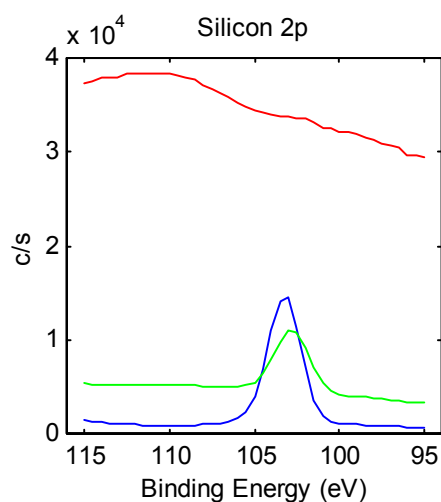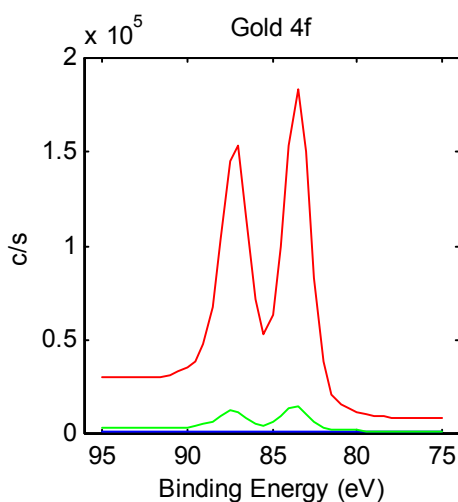

High resolution XPS of the 100 nm sample; red = reference, blue = coated; green = calcined

Jeroen51.spe: C, Si content on Au  
2002 Jul 11 Al mono 25.2 W 200.0  $\mu$   
C1s/Area9: JC37 area 9/1 (SG5)

IBM Almaden

3.4940e+004 max

53.29 s

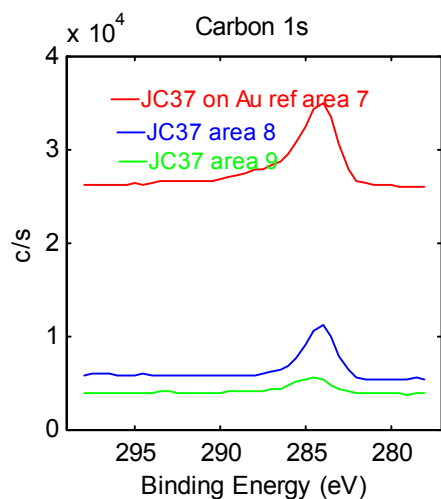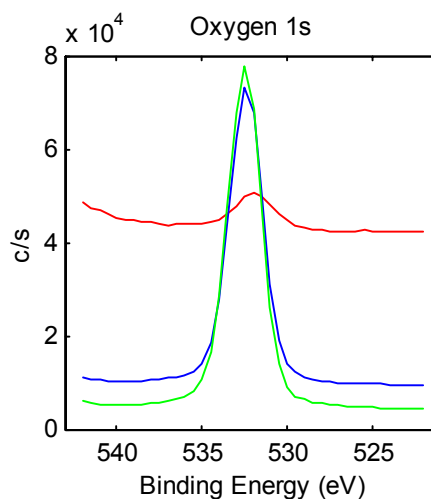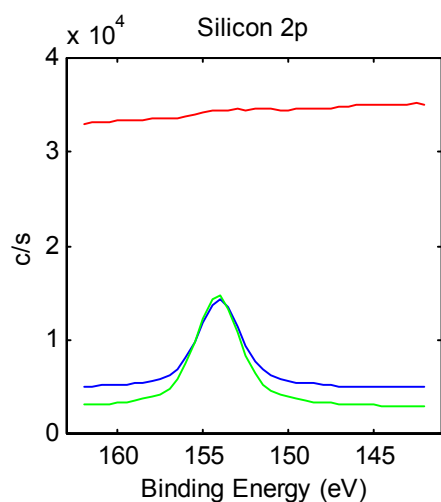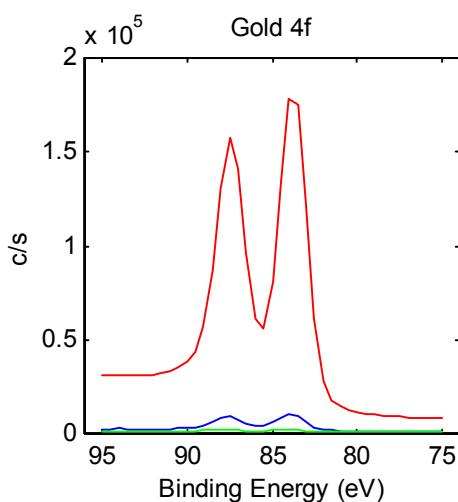



High resolution XPS of the 200 nm sample; red = reference, green = coated; blue = calcined

Jeroen54.spe: C, Si content on Au  
2002 Jul 11 Al mono 25.2 W 200.0  $\mu$   
C1s/Area12: JC47 area 12/1 (SG5)

IBM Almaden

3.3891e+004 max

53.29 s

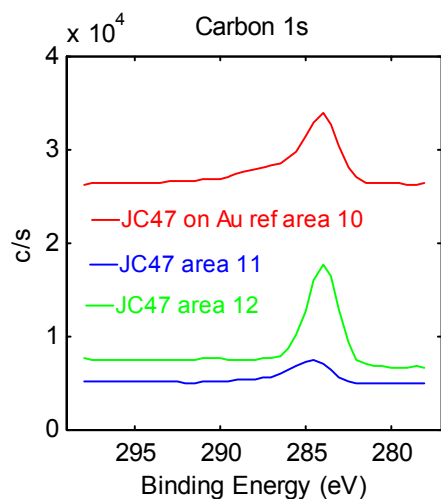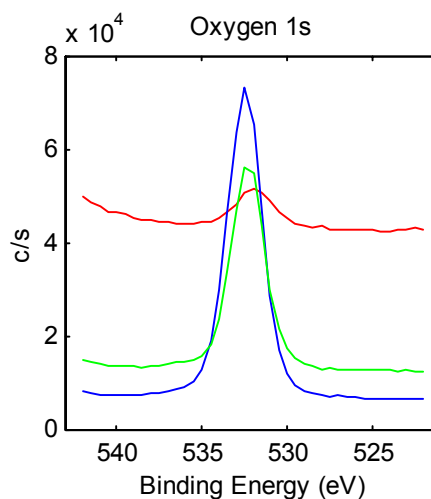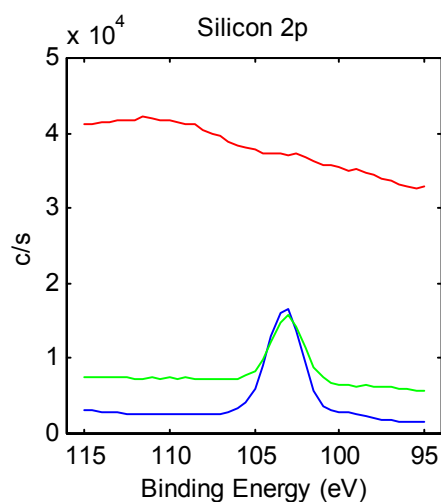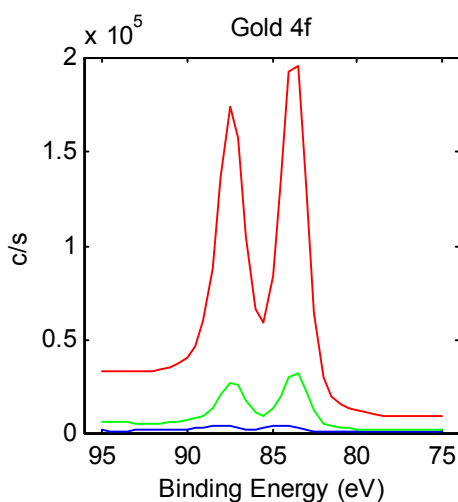

AFM image of 25 nm coated particle:

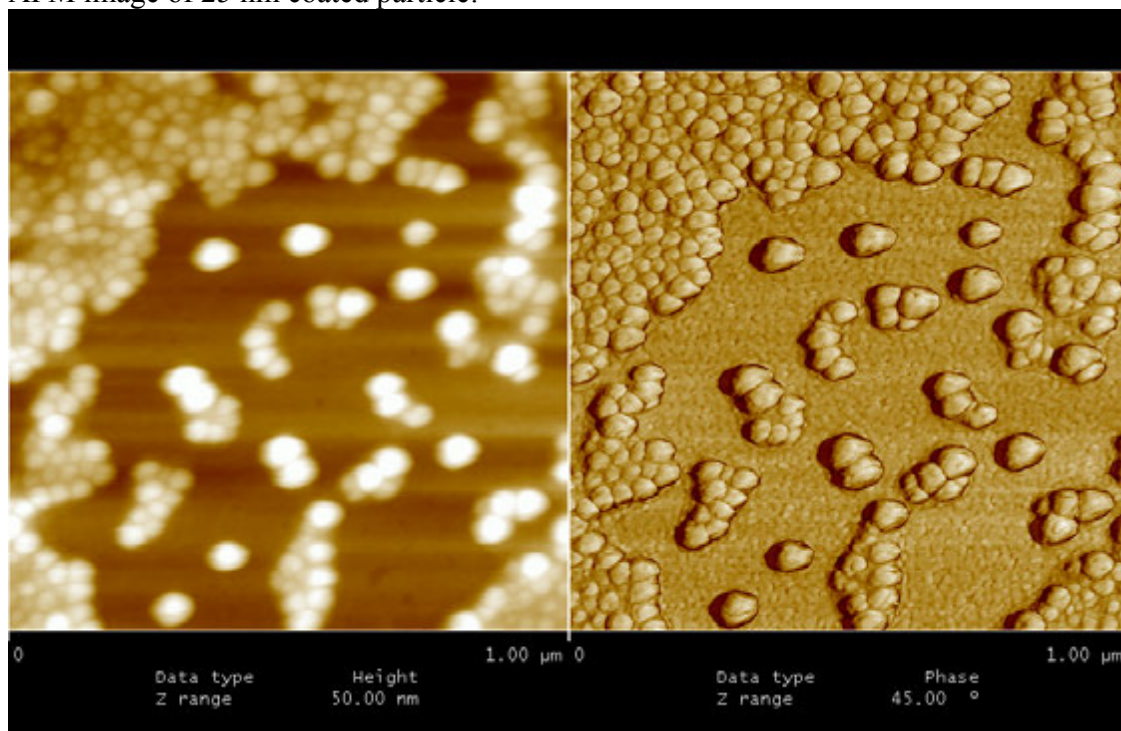

AFM image of 25 calcined particle

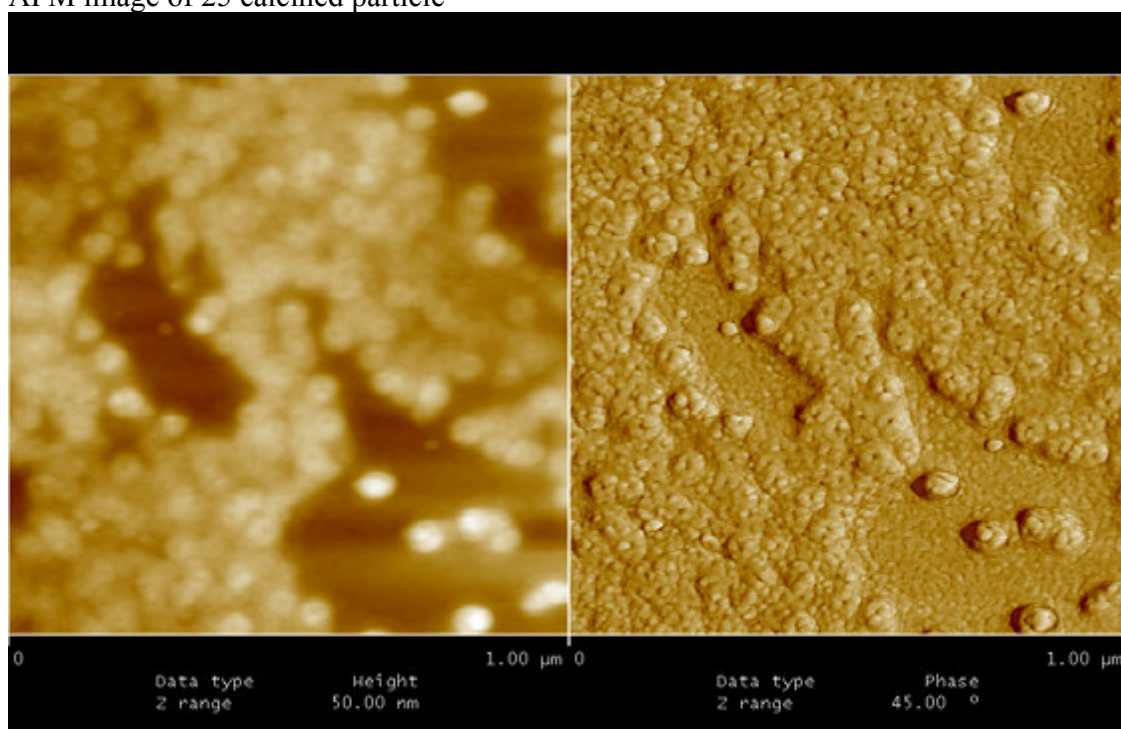

AFM image of 40 nm coated particle

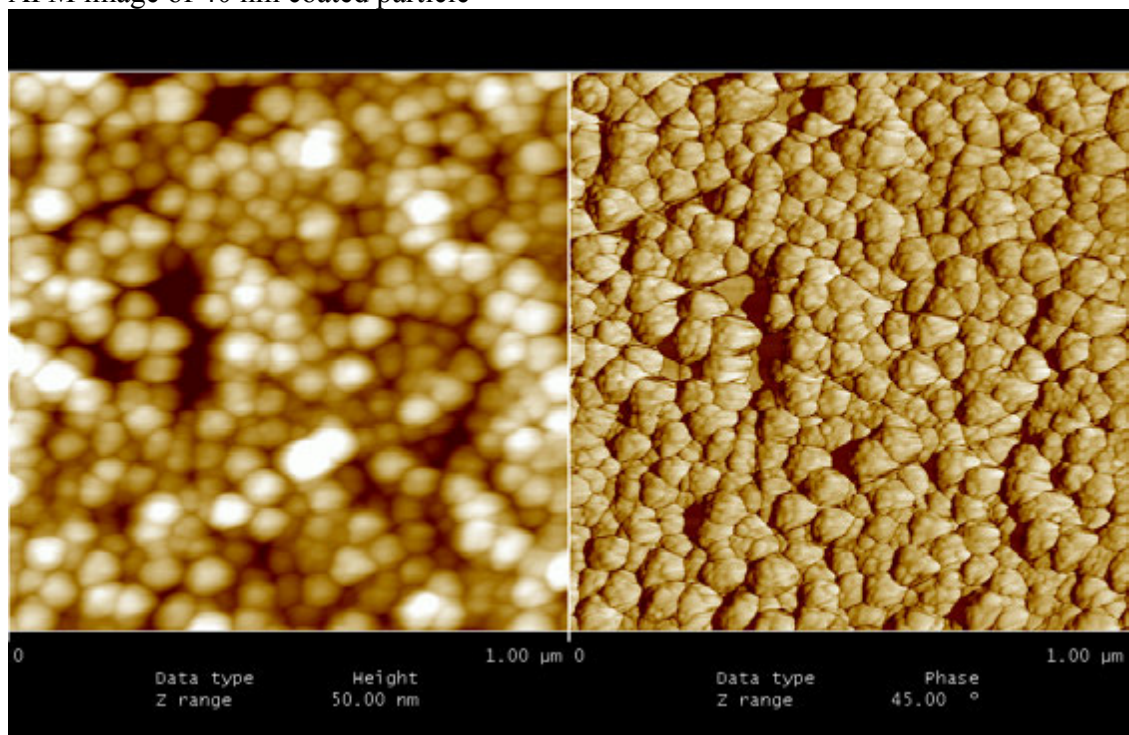

AFM image of 40 nm calcined particle

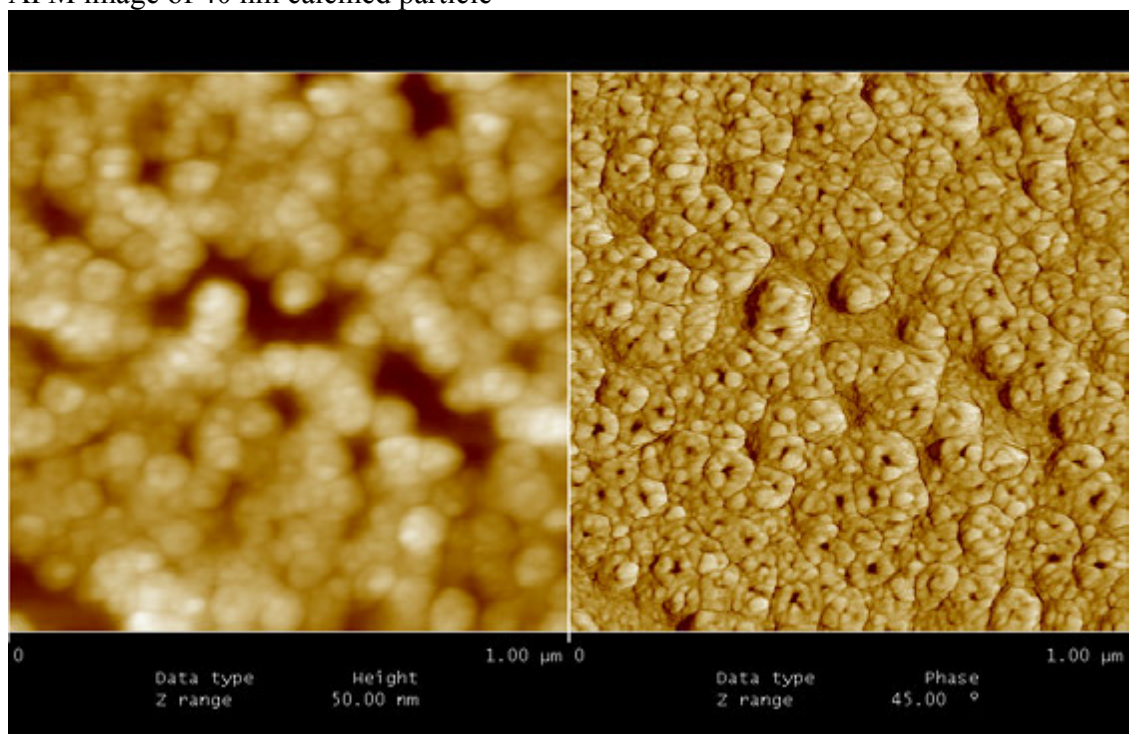



SEM image displaying the long range order in the slowly formed film of 200 nm coated spheres on a silicon wafer, after calcination.

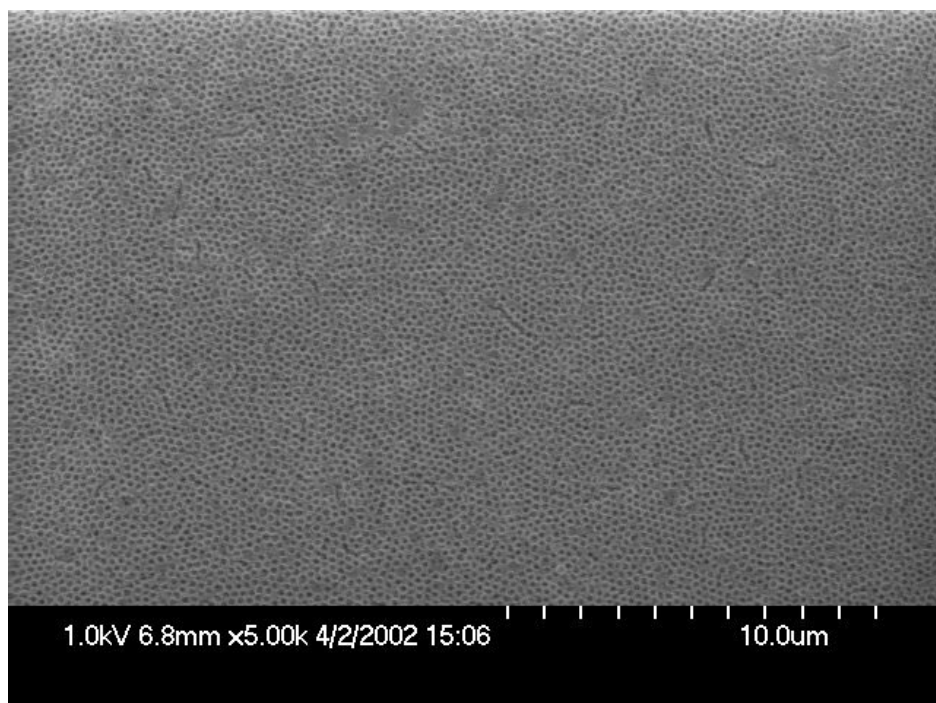

TEM image of SiO<sub>2</sub> coated polynorbornene-polyethyleneglycol star-shaped polymer. The detailed synthesis of the particles themselves will be published elsewhere (E.F. Connor *et al.* in preparation). For this particular sample a molecular weight of  $M_n = 37$  kD was found, with a PDI = 1.4.

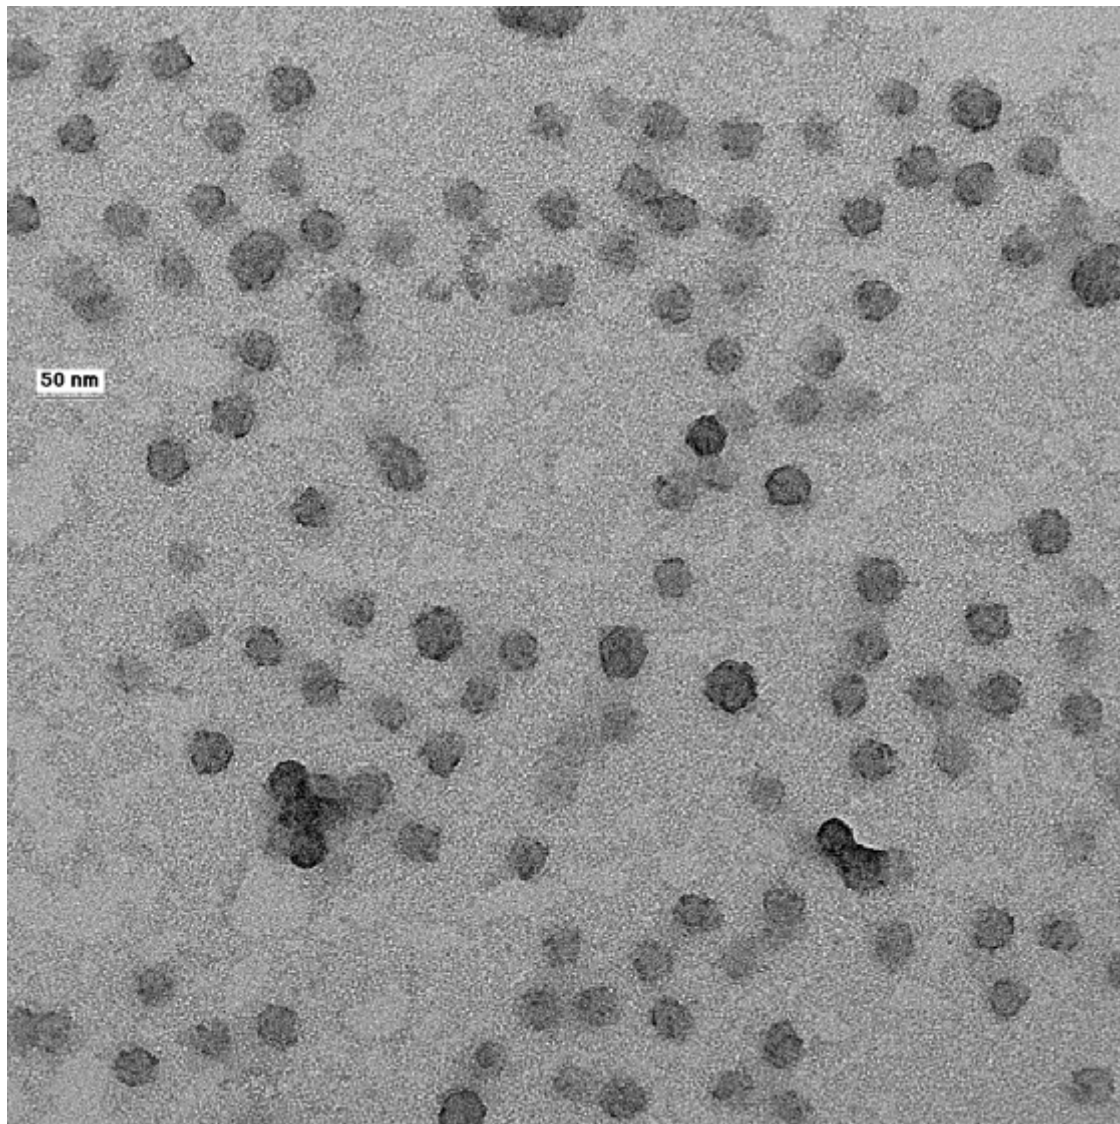

Supplement: b212811j.pdf [file b212811j.pdf]
